# Supplementary material
Source: publisher figshare collection journal article supplement (https://acs.figshare.com/ndownloader/files/31963318)
Supplement: Supplementary file 1 [file 31963318]

## Sheet: Sheet1
Table S2
Total organic carbon (TOC; as wt.%) and major elements (reposted as %)
Sample name		Depth	TOC	TS	Al2O3	CaO	Fe2O3	K2O	MgO	Na2O	P2O5	SiO2	TiO2	MnO
			(wt. %)	(wt. %)	(%)	(%)	(%)	(%)	(%)	(%)	(%)	(%)	(%)	(%)
O2m5
	T-mw-1	3306.72	0.105896	0.05	0.1255	56.4614	0.0823	0.0152	0.4535	—	0.008	0.4736	0.006	0.0028
	T-mw-2	3308.87	0.12		0.2906	40.3164	0.2822	0.0701	14.0199	—	0.0095	0.9262	0.0092	0.0052
	T-mw-3	3311.44	0.123306	0.09	0.5774	52.1774	0.1694	0.1678	2.4117	—	0.0125	1.5008	0.0207	0.0046
	T-mw-4	3314.53	0.369779	0.23	1.0872	52.7485	0.2849	0.3385	0.6143	—	0.0198	2.9311	0.0473	0.0045
	T-mw-5	3323.09	0.119315		6.3568	33.3564	2.084	2.462	5.6057	—	0.0703	17.1489	0.3376	0.0104
	T-mw-6	3325.54	0.0755923	0.33	1.9628	27.1897	0.9647	0.7981	17.5934	—	0.0265	10.9309	0.0896	0.0112
	T-mw-7	3327.6	0.0873089	0.12	0.7237	34.3471	0.3441	0.2781	17.7208	—	0.0071	1.4401	0.0266	0.0069
	T-mw-8	3329.9	0.0985701	0.33	1.8461	29.7258	0.7643	0.8675	17.0969	—	0.0251	7.7593	0.0861	0.0084
	T-mw-9	3332.14	0.128398	1.57	11.5596	23.5198	2.6219	4.5545	1.8489	0.0745	0.1272	32.6793	0.54	0.0106
	T-mw-10	3334.69	0.182065	1.21	6.2405	34.5454	1.6582	2.9117	0.944	—	0.0684	24.8027	0.2933	0.0074
	T-mw-11	3338.18	0.13		1.0517	36.2936	0.4073	0.4342	8.525	—	0.0175	3.852	0.0537	0.0035
	T-mw-12	3341.51	0.0726007	1.09	7.0608	18.4707	2.2799	3.5182	10.8445	0.0663	0.0917	26.7773	0.3101	0.0117
	T-mw-13	3347.54	0.0387627	5.48	0.1902	37.7627	0.1111	0.0488	1.6489	—	0.0071	0.6561	0.0007	0.0022
	T-mw-14	3354.59	0.152611	1.84	13.3644	7.9855	3.4279	6.3598	7.7192	0.1386	0.161	43.3546	0.6723	0.0159
	T-mw-15	3357.13	0.151038	0.76	2.0129	29.4626	0.8918	1.1654	18.6895	—	0.0294	5.9878	0.1082	0.0089
	T-mw-16	3358.79	0.0850465	0.15	0.2221	37.363	0.4312	0.111	16.9035	—	0.0061	0.8696	0.0061	0.0085
	T-mw-17	3367.75	0.0965318	0.71	5.7362	21.2953	2.0941	3.3056	11.8814	—	0.0987	23.6125	0.4018	0.0183
	T-mw-18	3370.71	0.0770354	0.78	0.2086	37.4476	0.4454	0.1018	18.426	—	0.0064	0.921	0.0111	0.0079
	T-mw-19	3375.11	0.1		1.5128	35.86	0.5326	0.6877	4.4619	—	0.0215	3.9953	0.0582	0.0034
	T-mw-20	3378.95	0.0705252	0.06	0.1101	30.6866	0.1832	0.0436	18.0204	—	0.0061	0.4856	0.0165	0.0072
	T-mw-21	3382.54	0.1309	0.36	0.3802	30.0913	0.3484	0.2381	18.2255	—	0.0099	1.3623	0.0243	0.0076
	T-mw-22	3383.72	0.0921211	0.45	0.2142	32.0143	0.7518	0.0894	20.4372	—	0.008	0.9425	0.0295	0.008
	T-mw-23	3388.31	0.0592759	0.2	0.4195	33.6562	0.1651	0.2011	10.629	—	0.0121	1.4964	0.0182	0.0039
	T-mw-24	3389.88	0.0995886	0.13	0.3383	30.6333	0.2531	0.1747	20.9532	—	0.0071	1.9963	0.029	0.0065
	T-mw-25	3393.9	0.0522785	1.67	0.1052	36.6781	0.0728	0.0293	4.2009	—	0.0073	0.353	—	0.0033
	T-mw-26	3396.04	0.0435942	0.01	0.0762	31.9129	0.1339	0.0188	21.4406	—	0.0061	0.1478	—	0.0066
	T-mw-27	3401.25	0.0292367	0.01	0.0474	31.3162	0.1317	0.0019	21.5721	—	0.0048	0.0205	—	0.0059
	T-mw-28	3405.47	0.032835	0.02	0.1286	31.2341	0.1642	0.0491	21.4411	—	0.0072	0.2398	0.0048	0.0063
O2m4
	T-ms-1	3415.19	0.043321	0.01	0.1794	31.1388	0.1636	0.1	21.4429	—	0.0062	0.374	0.0098	0.0053
	T-ms-2	3430.45	0.06		0.1066	31.1957	0.1004	0.0228	21.4315	—	0.0051	0.2234	0.0007	0.004
	T-ms-3	3446	0.0587449	0.01	0.0785	31.282	0.1225	0.0097	21.4295	—	0.0055	0.0845	—	0.0059
	T-ms-4	3459.63	0.05		0.0849	31.4971	0.0899	0.0117	21.1214	—	0.0032	0.1325	0.0097	0.0044
	T-ms-5	3476.36	0.0839764	0.05	0.1983	30.4253	0.1751	0.1116	20.8166	—	0.0066	2.1492	0.0078	0.0036
	T-ms-6	3487.7	0.07		0.3081	30.5142	0.1682	0.1652	20.8905	—	0.0024	2.1377	0.0099	0.0054
	T-ms-7	3506.13	0.0405271		0.6078	48.7574	0.1692	0.3263	5.0911	—	0.0085	1.6927	0.0265	0.0034
	T-ms-8	3521.9	0.0751156	0.03	0.1996	54.0778	0.0774	0.0783	1.065	—	0.0042	0.5622	0.0082	0.0029
	T-ms-9	3551.01	0.122511	0.25	1.6869	46.3241	0.4847	1.4731	2.4603	—	0.0154	9.1105	0.0742	0.0058
	T-ms-10	3661.58	0.08		0.1099	40.641	0.064	0.0226	1.3563	—	0.0035	0.3796	—	0.0016
	T-ms-11	3568.91	0.09		0.2286	56.1086	0.094	0.0787	2.0092	—	0.0055	0.7977	0.0082	0.0026
	T-ms-12	3579.11	0.0674304	0.11	0.4424	52.0222	0.1468	0.262	2.5167	—	0.0074	1.882	0.0264	0.0027
	T-ms-13	3599.42	0.0801405	0.06	0.3919	37.3761	0.1844	0.204	12.3335	—	0.0084	7.0527	0.0057	0.0059
	T-ms-14	3619.04	0.07		0.5506	46.6614	0.4731	0.3273	6.8507	—	0.0064	1.9211	0.028	0.0037
	T-ms-15	3633.01	0.0772661	0.05	0.2445	49.6523	0.1283	0.119	4.977	—	0.0076	0.9203	0.0217	0.0038
	T-ms-16	3650.95	0.07		0.6425	51.0292	0.2592	0.2879	2.1522	—	0.0079	3.7412	0.0305	0.004
	T-ms-17	3688	0.0990031	0.33	2.376	35.6526	0.7346	1.0591	11.3676	—	0.0267	8.9411	0.098	0.0079
	T-ms-18	3723.85	0.0340763	0.12	0.64	30.7898	0.3968	0.3747	20.4235	—	0.0097	2.3244	0.0288	0.0074
O2m3
	T-msa-1	3778.94	0.443915	0.2	7.4698	17.1789	2.0895	5.3845	14.0631	0.0706	0.0694	24.2127	0.2681	0.0195
	T-msa-2	3755.84	0.134707	3.04	6.1672	24.7199	1.9799	4.3066	10.7487	0.0196	0.0809	22.1906	0.3027	0.0118
	T-msa-3	3747.36	0.147626	0.44	1.9862	31.7209	0.6227	1.3323	4.2705	——	0.0331	7.8857	0.0817	0.0047
	T-msa-4	3786.4	0.232672	0.7	8.7614	14.1907	2.9398	6.2011	8.8937	0.0748	0.0861	33.5522	0.4899	0.0134
	T-msa-5	3765.82	0.114156	0.57	4.8946	33.8007	1.7256	3.2807	7.8133	——	0.0807	19.9951	0.2746	0.0073
	T-msa-6	3784.58	0.254613	0.71	9.071	18.7576	2.9836	6.0636	8.6769	0.0667	0.0941	28.4732	0.4521	0.0166
	T-msa-7	3746.12	0.202342	0.36	6.4741	33.5237	1.4984	4.2712	5.441	0.0032	0.0827	22.2272	0.31	0.0091
	T-msa-8	3822.14	0.350463	0.43	8.2357	15.1243	2.4036	5.983	10.8699	0.0508	0.082	29.93	0.448	0.017
	T-msa-9	3788.79	0.113125	0.43	5.6699	29.7594	2.0263	3.7676	9.637	0.0119	0.0755	19.5667	0.2907	0.0118
	T-msa-10	3817.42	0.218588	0.34	4.5259	39.1978	1.5095	3.1762	6.5514	——	0.083	17.3094	0.1983	0.009
	T-msa-11	3779.82	0.198735	0.81	4.01	30.6155	1.1213	2.653	4.7402	——	0.0439	13.4136	0.1753	0.0063
	T-msa-12	3763.01	0.055676	6.04	1.7572	37.2069	0.3972	1.1326	1.8101	——	0.0245	6.1677	0.0681	0.0034
	T-msa-13	3767.23	0.205881	0.96	10.1454	12.7501	3.3478	7.396	10.0722	0.0606	0.1065	31.3671	0.526	0.016
	T-msa-14	3809.86	0.204233	0.65	6.8772	19.22	2.9535	4.6426	9.2107	0.0324	0.0904	29.914	0.3624	0.0173
